# Supplementary material
Source: PubMed Central journal article supplement (PMC2639167)

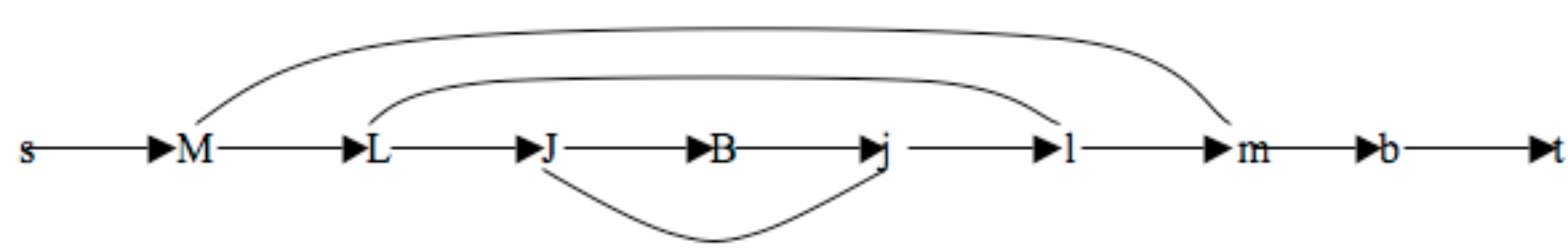

Supplement: btn393_3.pdf [file btn393_3.pdf]

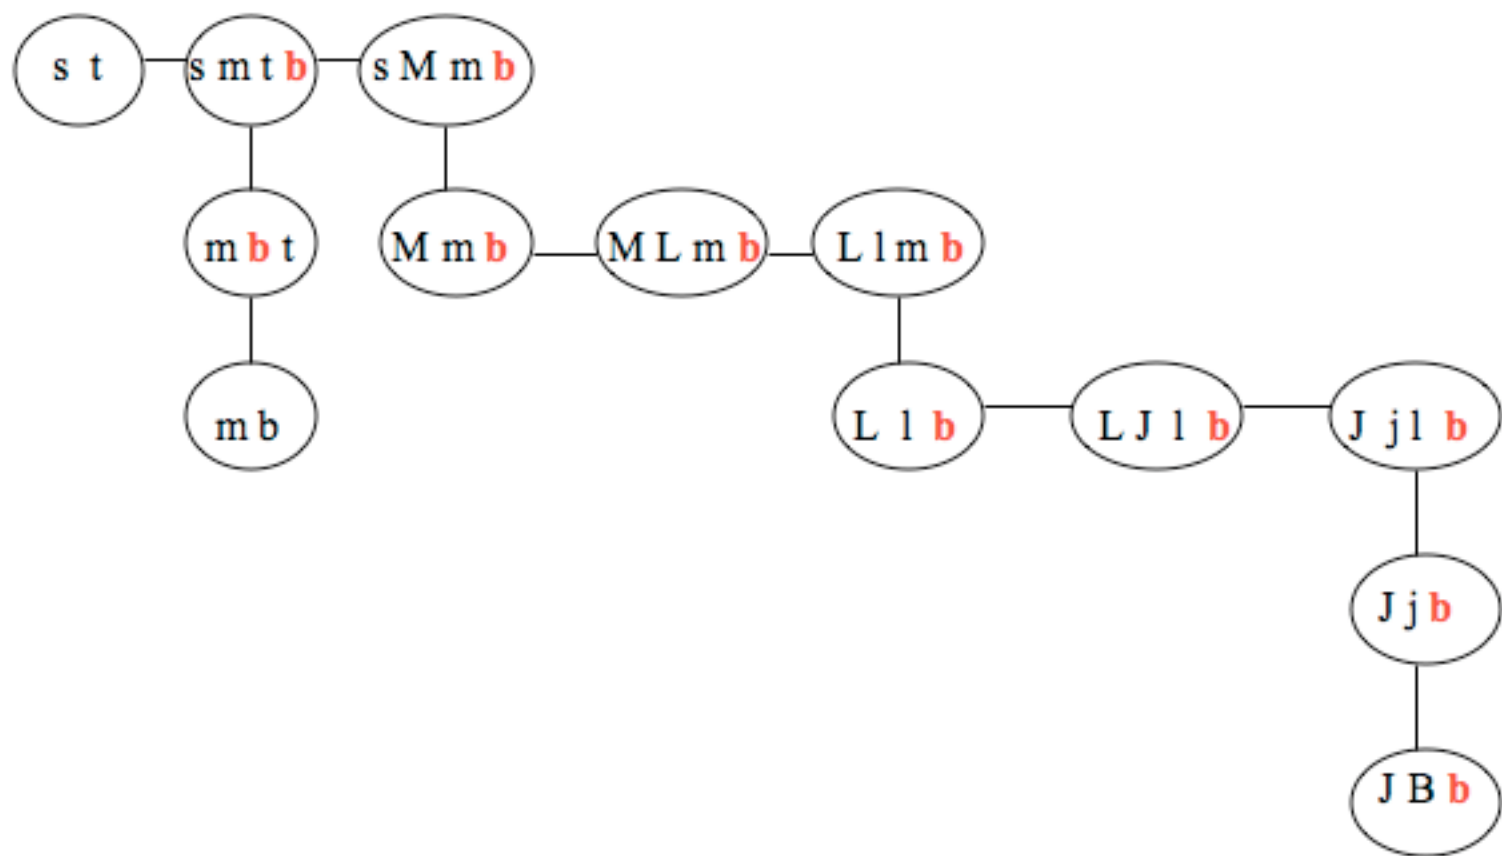

Supplement: btn393_4.pdf [file btn393_4.pdf]

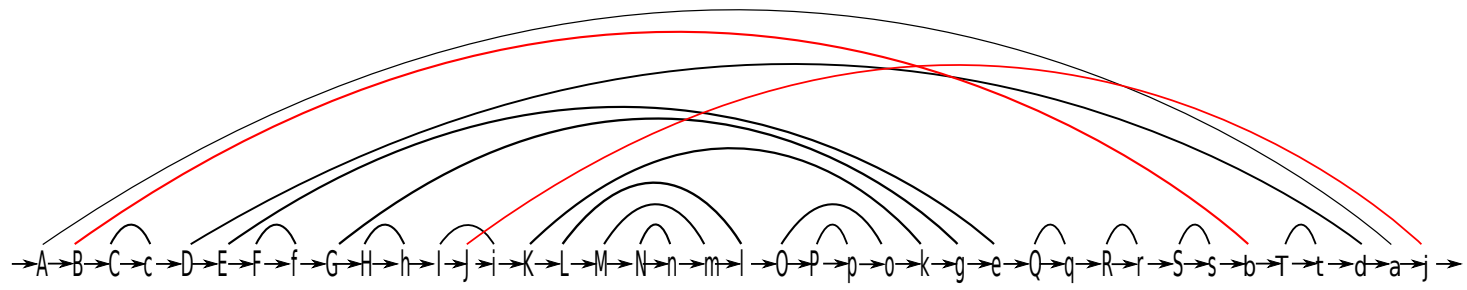

Supplement: btn393_5.pdf [file btn393_5.pdf]
